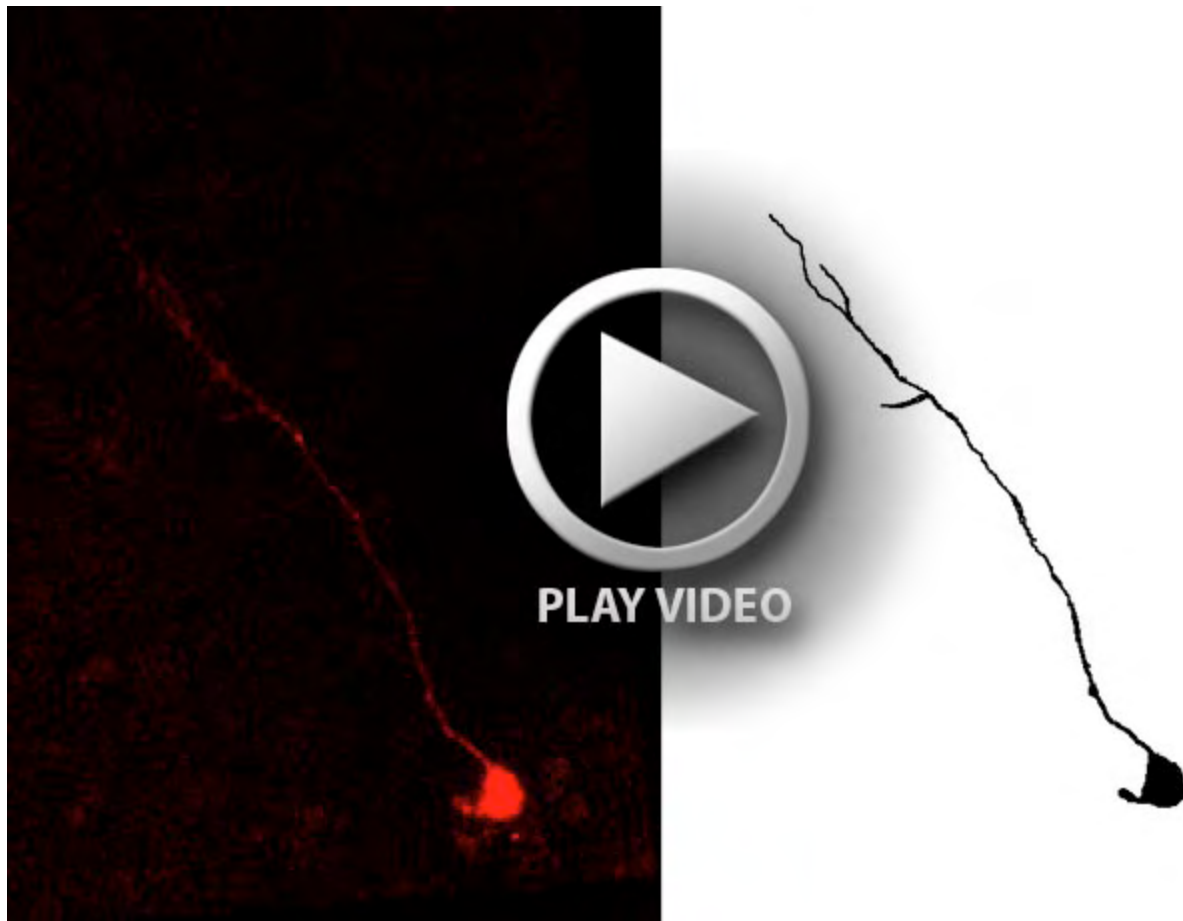

**Movie 1. Repeated confocal imaging of adult-born neuron extending neurites in hippocampal slice cultures.** The movie starts 4 days after retroviral injection in vivo. The culture is imaged every 24 hours for 6 days. The right panel shows a digital reconstruction.
